# Supplementary material
Source: PubMed Central journal article supplement (PMC3781961)
Supplement: 92ee4d6c3092377c5e73600ce9941953_genetics.113.149567-1.pdf [file 92ee4d6c3092377c5e73600ce9941953_genetics.113.149567-1.pdf]

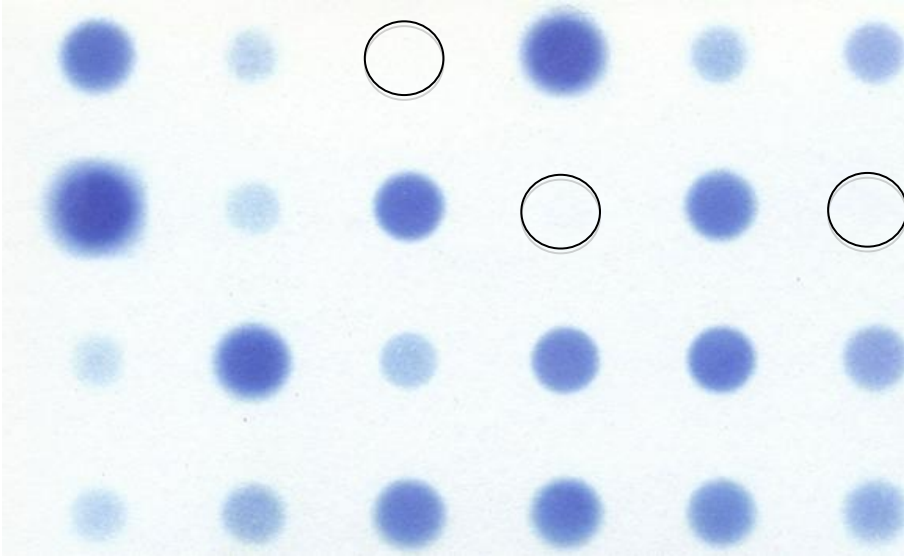

**Figure S1** Feigl–Anger paper example for the *dhr2-1* segregating Sorghum line. The black circles indicate areas in which no HCN was released (Feigl and Anger, 1966; Kakes, 1991; Takos *et al.*, 2010; Blomstedt *et al.*, 2011; Hay-Roe *et al.*, 2011) from the EMS-treated Sorghum individuals. Blue spots indicate HCN release.

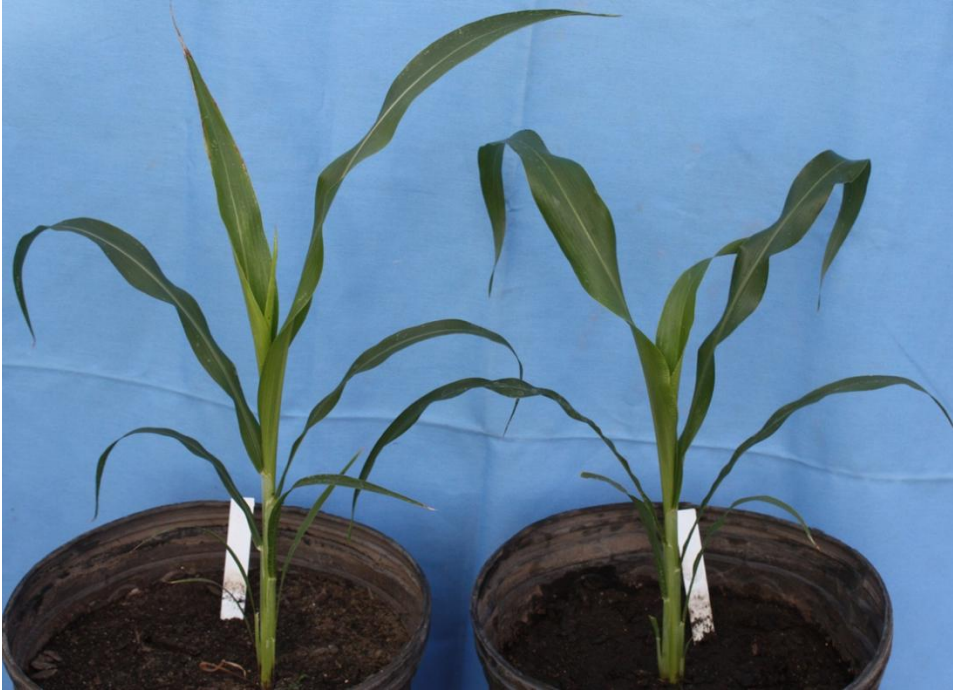

**Figure S2** Photograph of young adult plants BTx623, or wild type, and acyanogenic *dhr2-1*. Gross morphological characteristics do not differ between wild type and the acyanogenic mutant.

**Table S1**

| Pathway <sup>1</sup> | Gene <sup>2</sup>     | Chromosome | Position <sup>3</sup> |
|----------------------|-----------------------|------------|-----------------------|
| Biosynthetic         | CYP79A1               | Chr 1      | 1131660-1134016 bp    |
|                      | CYP71E1               | Chr 1      | 1058885-1061083 bp    |
|                      | UDP-glucose           | Chr 1      | 1161652-1163330 bp    |
| Catabolic            | <i>Dhurrinase1</i>    | Chr 8      | 13351340-13355948 bp  |
|                      | <i>Dhurrinase1</i>    | Chr 8      | 13743124-13746145 bp  |
|                      | hydroxymandelonitrile | Chr 4      | 66152351-66157119 bp  |

<sup>1</sup> The pathway column references the dhurrin biosynthetic and catabolic pathways.

<sup>2</sup> Genes that fall within the dhurrin biosynthetic or catabolic pathways.

<sup>3</sup> Position in base pairs (bp).

**Table S2**

|        | <i>dhr2</i> genotype |     |     |
|--------|----------------------|-----|-----|
|        | -/-                  | +/- | +/+ |
| HCN    | 1                    | 15  | 7   |
| No HCN | 25                   |     |     |
