# Supplementary material
Source: PubMed Central journal article supplement (PMC3781961)
Supplement: 126ea755fabb22ea57221d7a23ad4f43_genetics.113.149567-3.pdf [file 126ea755fabb22ea57221d7a23ad4f43_genetics.113.149567-3.pdf]

**Table S2**

|        | <i>dhr2</i> genotype |     |     |
|--------|----------------------|-----|-----|
|        | -/-                  | +/- | +/+ |
| HCN    | 1                    | 15  | 7   |
| No HCN | 25                   |     |     |
