# Supplementary material
Source: PubMed Central journal article supplement (PMC3781961)
Supplement: 558fb69231c1229a01a9922e94bc0c37_genetics.113.149567-5.pdf [file 558fb69231c1229a01a9922e94bc0c37_genetics.113.149567-5.pdf]

**Table S1**

| Pathway <sup>1</sup> | Gene <sup>2</sup>     | Chromosome | Position <sup>3</sup> |
|----------------------|-----------------------|------------|-----------------------|
| Biosynthetic         | CYP79A1               | Chr 1      | 1131660-1134016 bp    |
|                      | CYP71E1               | Chr 1      | 1058885-1061083 bp    |
|                      | UDP-glucose           | Chr 1      | 1161652-1163330 bp    |
| Catabolic            | <i>Dhurrinase1</i>    | Chr 8      | 13351340-13355948 bp  |
|                      | <i>Dhurrinase1</i>    | Chr 8      | 13743124-13746145 bp  |
|                      | hydroxymandelonitrile | Chr 4      | 66152351-66157119 bp  |

<sup>1</sup> The pathway column references the dhurrin biosynthetic and catabolic pathways.

<sup>2</sup> Genes that fall within the dhurrin biosynthetic or catabolic pathways.

<sup>3</sup> Position in base pairs (bp).
