# Supplementary material
Source: PubMed Central journal article supplement (PMC3781961)
Supplement: 852b93ce4a93eed86dc2a5262de9d00d_genetics.113.149567-4.pdf [file 852b93ce4a93eed86dc2a5262de9d00d_genetics.113.149567-4.pdf]

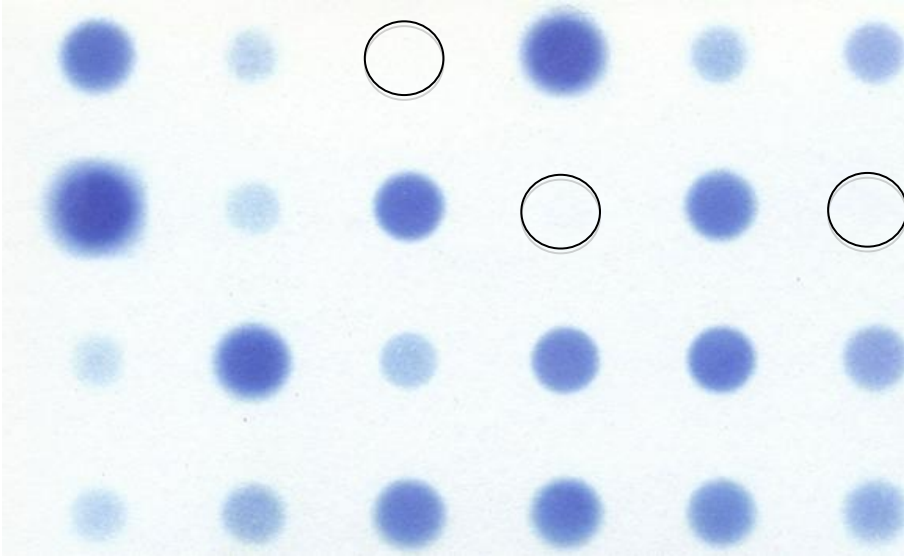

**Figure S1** Feigl–Anger paper example for the *dhr2-1* segregating Sorghum line. The black circles indicate areas in which no HCN was released (Feigl and Anger, 1966; Kakes, 1991; Takos *et al.*, 2010; Blomstedt *et al.*, 2011; Hay-Roe *et al.*, 2011) from the EMS-treated Sorghum individuals. Blue spots indicate HCN release.
