# Supplementary material
Source: PubMed Central journal article supplement (PMC3781961)
Supplement: e9b71bbede37a8c9b166eee16d9091a9_genetics.113.149567-2.pdf [file e9b71bbede37a8c9b166eee16d9091a9_genetics.113.149567-2.pdf]

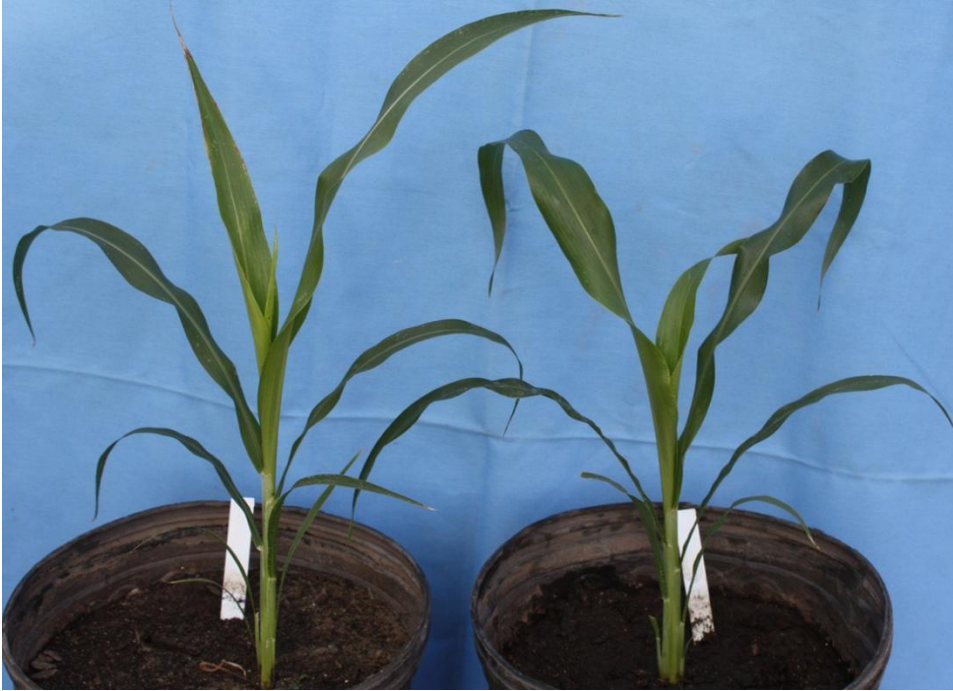

**Figure S2** Photograph of young adult plants BTx623, or wild type, and acyanogenic *dhr2-1*. Gross morphological characteristics do not differ between wild type and the acyanogenic mutant.
